# Supplementary material for: Discovering a Multi-Component Combination against Vascular Dementia from Danshen-Honghua Herbal Pair by Spectrum-Effect Relationship Analysis
Source: MDPI journal article supplement (doi:10.3390/ph15091073), 2022-08-29
Supplement: s1 [file pharmaceuticals-1860970-supplementary.pdf › pharmaceuticals-1860970-supplementary.pdf]

## **Supplementary Materials**

### **Discovering a multi-component combination against vascular dementia from Danshen-Honghua herbal pair by spectrum-effect relationship analysis**

Peilin Zhang<sup>†</sup>, Shiru He<sup>†</sup>, Siqi Wu, Yi Li, Huiying Wang, Changyang Yan, Hua Yang\*,  
Ping Li\*

*State Key Laboratory of Natural Medicines, China Pharmaceutical University, No. 24  
Tongjia Lane, Nanjing 210009, China*

<sup>†</sup> These authors contributed equally to this work.

\* Corresponding authors: China Pharmaceutical University, No. 24, Tongjia Lane,  
Nanjing, China. Tel: +86 25 8327 1379; fax: +86 25 8327 1379.

E-mail addresses: 104yang104@163.com (H. Yang), liping2004@126.com (P. Li).

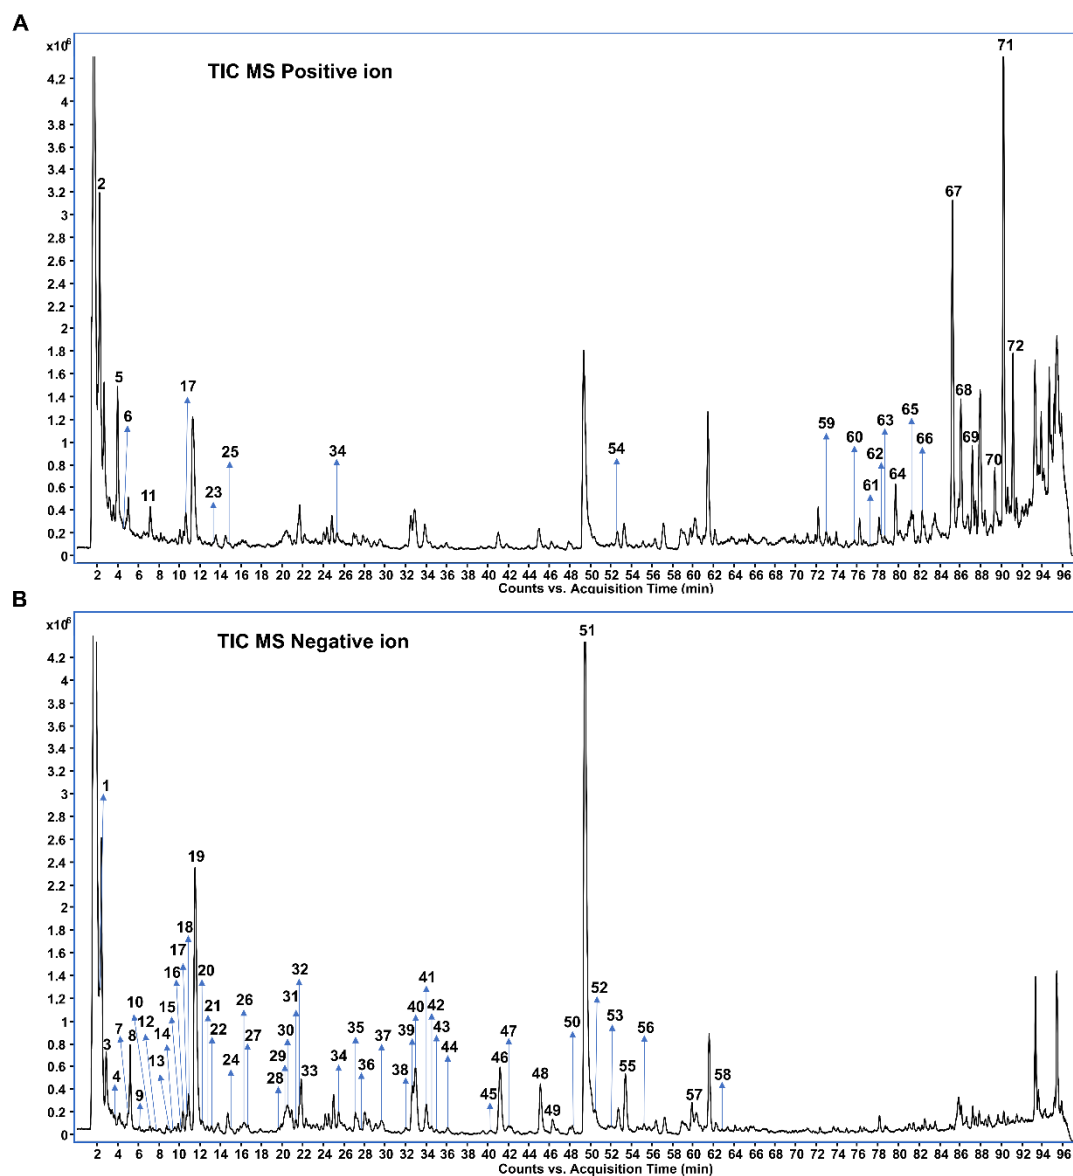

**Figure S1.** The total ion chromatograms (TIC) of Danshen-Honghua (DH) herbal pair extracted by ultra-high performance liquid chromatography coupled with quadrupole time-of-flight tandem mass spectrometry (UHPLC-QTOF MS) in (A) positive- and (B) negative-ion mode.

**Table S1.** Death number of zebrafish in different concentrations of eight DH herbal pair in phenylhydrazine (PHZ)-induced thrombosis model.

|        | 600 µg/mL | 300 µg/mL | 150 µg/mL | 75 µg/mL | 50 µg/mL |
|--------|-----------|-----------|-----------|----------|----------|
| DS     | 30        | 30        | 30        | 3        | 0        |
| DH 5:1 | 30        | 30        | 21        | 0        | 0        |
| DH 4:1 | 30        | 30        | 30        | 2        | 0        |
| DH 3:1 | 30        | 30        | 22        | 0        | 0        |
| DH 2:1 | 30        | 30        | 17        | 0        | 0        |
| DH 1:1 | 30        | 24        | 15        | 0        | 0        |
| DH 1:2 | 30        | 22        | 11        | 0        | 0        |
| HH     | 30        | 20        | 13        | 0        | 0        |

DS: Danshen; HH: Honghua; DH: Danshen-Honghua; n = 30.

**Table S2.** Death number of zebrafish in different concentrations of eight DH herbal pair in bisphenol F (BPF)-induced neuronal injury model.

|        | 600 µg/mL | 300 µg/mL | 150 µg/mL | 75 µg/mL | 50 µg/mL |
|--------|-----------|-----------|-----------|----------|----------|
| DS     | 30        | 30        | 17        | 0        | 0        |
| DH 5:1 | 30        | 30        | 13        | 0        | 0        |
| DH 4:1 | 30        | 30        | 18        | 0        | 0        |
| DH 3:1 | 30        | 25        | 16        | 0        | 0        |
| DH 2:1 | 30        | 15        | 3         | 0        | 0        |
| DH 1:1 | 26        | 10        | 3         | 0        | 0        |
| DH 1:2 | 24        | 10        | 2         | 0        | 0        |
| HH     | 22        | 9         | 1         | 0        | 0        |

DS: Danshen; HH: Honghua; DH: Danshen-Honghua; n = 30.

**Table S3.** Death number of zebrafish in different concentrations of eight DH herbal pair in ponatinib-induced ischemic stroke model.

|        | 600 µg/mL | 300 µg/mL | 150 µg/mL | 75 µg/mL | 50 µg/mL |
|--------|-----------|-----------|-----------|----------|----------|
| DS     | 30        | 30        | 24        | 0        | 0        |
| DH 5:1 | 30        | 29        | 0         | 0        | 0        |
| DH 4:1 | 30        | 30        | 6         | 0        | 0        |
| DH 3:1 | 30        | 30        | 21        | 0        | 0        |
| DH 2:1 | 30        | 20        | 1         | 0        | 0        |
| DH 1:1 | 10        | 1         | 0         | 0        | 0        |
| DH 1:2 | 10        | 3         | 0         | 0        | 0        |
| HH     | 8         | 6         | 0         | 0        | 0        |

DS: Danshen; HH: Honghua; DH: Danshen-Honghua; n = 30.

**Table S4.** Standard curves, limits of detection, limits of quantification, precision (intra-day, inter-day), repeatability, stability, and accuracy for 11 components measured.

| Analytes                  | Regression equation  | r <sup>2</sup> | Test range (µg/mL) | LODs (µg/mL) | LOQs (µg/mL) | Precision (RSD%) |           | Repeatability (RSD%) | Stability (RSD%) | Recovery rate% |
|---------------------------|----------------------|----------------|--------------------|--------------|--------------|------------------|-----------|----------------------|------------------|----------------|
|                           |                      |                |                    |              |              | Inter-day        | Intra-day |                      |                  |                |
| Danshensu                 | y = 3.2869x – 8.1043 | 0.9997         | 3.97-254.54        | 0.020        | 0.199        | 0.20             | 2.07      | 1.77                 | 1.41             | 101.80 ± 3.12  |
| Hydroxysafflor yellow A   | y = 7.2194x – 38.216 | 0.9998         | 10.48-671.10       | 0.010        | 0.052        | 0.35             | 2.81      | 1.19                 | 1.11             | 100.04 ± 3.27  |
| Kaempferol-3-O-rutinoside | y = 3.8949x – 5.4964 | 0.9996         | 1.95-125.00        | 0.195        | 0.977        | 0.73             | 0.50      | 1.64                 | 1.25             | 105.47 ± 4.04  |
| Rosmarinic acid           | y = 11.646x – 18.487 | 0.9998         | 3.00-192.00        | 0.015        | 0.150        | 0.31             | 1.99      | 1.11                 | 0.97             | 98.98 ± 4.03   |
| Lithospermic acid         | y = 6.0798x – 6.6936 | 0.9998         | 2.50-160.00        | 0.003        | 0.250        | 0.20             | 2.62      | 1.51                 | 1.01             | 97.18 ± 2.42   |
| Salvianolic acid B        | y = 15.236x – 43.857 | 0.9999         | 6.64-425.00        | 0.003        | 0.007        | 0.36             | 1.96      | 1.20                 | 0.93             | 100.01 ± 3.19  |
| Salvianolic acid A        | y = 12.192x – 26.213 | 0.9994         | 2.44-156.25        | 0.041        | 0.244        | 1.69             | 1.62      | 1.25                 | 0.97             | 101.04 ± 2.12  |
| Dihydroisotanshinone I    | y = 16.926x – 6.9338 | 0.9997         | 0.68-43.68         | 0.022        | 0.087        | 0.75             | 1.64      | 2.2                  | 0.47             | 103.14 ± 3.38  |
| Cryptotanshinone          | y = 6.799x – 4.9258  | 0.9998         | 1.61-103.12        | 0.052        | 0.206        | 0.79             | 1.92      | 3.09                 | 0.58             | 98.89 ± 1.13   |
| Tanshinone I              | y = 14.407x – 2.3377 | 1              | 0.78-50.00         | 0.010        | 0.025        | 0.71             | 1.51      | 2.59                 | 1.03             | 97.27 ± 2.93   |
| Tanshinone IIA            | y = 15.416x + 2.2662 | 0.9999         | 2.16-138.46        | 0.000        | 0.014        | 0.75             | 2.24      | 3.32                 | 0.63             | 95.76 ± 2.13   |

r<sup>2</sup>: correlation coefficients; LODs: limits of detection; LOQs: limits of quantification; RSD: relative standard deviations.
